# Supplementary material
Source: PubMed Central journal article supplement (PMC7611489)
Supplement: EMS114600-supplement-ExtendedData_Fig3.pdf [file EMS114600-supplement-ExtendedData_Fig3.pdf]

|         |      |                            |             |            |               |             |             |            |             |             |                                                  |      |
|---------|------|----------------------------|-------------|------------|---------------|-------------|-------------|------------|-------------|-------------|--------------------------------------------------|------|
| Hs NM2a | 1    | MAQQA---DKYLVDKNF          | INNPLAQADW  | AAKLVVWPS  | DKSGEPASL     | KEEVGEAAIV  | ELVENGKVKV  | VNKDDIQMN  | PPKFSKVEDM  | AELTCLNEAS  | 96                                               |      |
| Mg SmM  | 1    | MSQK-PLSD EKFLFVYDKNF      | VNNPLAQADW  | SAKLVVWPS  | EYKGFEEAISI   | KEEKGDEVTV  | ELQENGKVVV  | LSKDDIQMN  | PPKFSKVEDM  | AELTCLNEAS  | 99                                               |      |
| Hs SmM  | 1    | MAQKQLSD EKFLFVYDKNF       | INSVPAQADW  | AAKLVVWPS  | EKQGFEEAISI   | KEEKGDEVTV  | ELVENGKVVV  | VGKDDIQMN  | PPKFSKVEDM  | AELTCLNEAS  | 100                                              |      |
|         |      | Helix A                    | Helix B     |            | SH3-like fold |             |             |            |             |             |                                                  |      |
| Hs NM2a | 97   | VLHNLKERYYSGLIYTYSGSGL     | FCVVVNPYKN  | LPIYSEIVE  | MYKGGKRHEM    | PPHIYAIADT  | AYRSMQDRE   | DQSILCTGES | GAGKTENTKK  | VIQYLAVVAS  | 196                                              |      |
| Mg SmM  | 100  | VLHNLKERYYSGLIYTYSGSGL     | FCVVVNPYKQ  | LPIYSEKIID | MYKGGKRHEM    | PPHIYAIADT  | AYRSMQDRE   | DQSILCTGES | GAGKTENTKK  | VIQYLAVVAS  | 199                                              |      |
| Hs SmM  | 101  | VLHNLKERYYSGLIYTYSGSGL     | FCVVVNPYKH  | LPIYSEKIVD | MYKGGKRHEM    | PPHIYAIADT  | AYRSMQDRE   | DQSILCTGES | GAGKTENTKK  | VIQYLAVVAS  | 200                                              |      |
|         |      | Helix C                    | β1          | β2         | Helix D       | Helix E     | β4          | P-loop     | Helix F     |             |                                                  |      |
| Hs NM2a | 197  | SHKSKKQD-----GE            | LERQLLQANP  | IIEAFGNAKT | VKNDNSRRFG    | KFIRINFDVN  | GYIVGANIEF  | YLLEKSRAIR | QAKEERTFHI  | FYYLLSGAGE  | 286                                              |      |
| Mg SmM  | 200  | SHKSKKQDTSI TQGFSSFSYGE    | LEKQLLQANP  | IIEAFGNAKT | VKNDNSRRFG    | KFIRINFDVT  | GYIVGANIEF  | YLLEKSRAIR | QAKDERTFHI  | FYYLLSGAGE  | 299                                              |      |
| Hs SmM  | 201  | SHKSKKQDTSI T-----GE       | LEKQLLQANP  | IIEAFGNAKT | VKNDNSRRFG    | KFIRINFDVT  | GYIVGANIEF  | YLLEKSRAIR | QAKDERTFHI  | FYYLLSGAGE  | 293                                              |      |
|         |      | Loop 1                     | Helix G & H | Switch 1   | β6            | β7          |             |            | Helix I     |             |                                                  |      |
| Hs NM2a | 287  | HLKTDLLEP                  | YNYRFLNSG   | HVTIPGQDK  | DMFOETMEAM    | RIMGPEEFG   | MGLLRVIVSG  | LQLGNIVFKK | ERNTDQASMP  | DNTAAQKVSH  | LLGINVTDFT                                       | 386  |
| Mg SmM  | 300  | QMRNDLLEP                  | FNNYTFNSG   | HVPIPAQDD  | EMFOETLEAM    | RIMGFTEEG   | TSILRVVSSV  | LQLGNIVFKK | ERNTDQASMP  | DNTAAQKVCH  | LLGINVTDFT                                       | 399  |
| Hs SmM  | 294  | KMRSDLLEP                  | FNNYTFNSG   | FVPIPAQDD  | EMFOETVEAM    | AIMGFSSEEQ  | LSILKVVSSV  | LQLGNIVFKK | ERNTDQASMP  | DNTAAQKVCH  | LLGINVTDFT                                       | 393  |
|         |      | Helix J                    | Helix K     |            | Helix L       | Loop 4      | Helix M     |            |             |             |                                                  |      |
| Hs NM2a | 387  | RGILTPRIKVR                | GRDVFQKAAQT | KEQADFAIEA | LAKATYERMF    | RWLVLIRINKA | IDTKRQGS    | FIGILDIAGF | EIFDLNSFEQ  | LCINVTNEKL  | QQLFNHTMFI                                       | 486  |
| Mg SmM  | 400  | RSILTPRIKVR                | GRDVFQKAAQT | KEQADFAIEA | LAKAFERLF     | RWILTRVNKA  | IDTKRQGS    | FLGILDIAGF | EIFEINSFEQ  | LCINVTNEKL  | QQLFNHTMFI                                       | 499  |
| Hs SmM  | 394  | RSILTPRIKVR                | GRDVFQKAAQT | KEQADFAIEA | LAKATYERLF    | RWILTRVNKA  | IDTKRQGS    | FLGILDIAGF | EIFEVNSFEQ  | LCINVTNEKL  | QQLFNHTMFI                                       | 493  |
|         |      | Helix N                    | HCM Loop    | Helix O    | Loop 5        | Switch 2    | Relay Helix |            |             |             |                                                  |      |
| Hs NM2a | 487  | LEQEEYQRE                  | IEWNFIDFGL  | DLPCIDLIE  | KPAGPPGILA    | LLDEEWFPK   | ATDKSFVEVK  | MQEQSTHPFK | QKPKQLKDKA  | DFCIHYAGK   | VYKADKELML                                       | 586  |
| Mg SmM  | 500  | LEQEEYQRE                  | IEWNFIDFGL  | DLPCIELEIE | RPNPPGULA     | LLDEEWFPK   | ATDTSFVEKL  | IQEQGNHPFK | QKSKQLKDKT  | EFCILHYAGK  | VSYNASAMLT                                       | 599  |
| Hs SmM  | 494  | LEQEEYQRE                  | IEWNFIDFGL  | DLPCIELEIE | RPNPPGULA     | LLDEEWFPK   | ATDKSFVEVK  | CTEQSSHPFK | QKPKQLKDKT  | EFSIHYAGK   | VDYNASAMLT                                       | 593  |
|         |      | Helix Q                    | Helix R     | Helix S    | Loop 3        |             |             |            |             |             |                                                  |      |
| Hs NM2a | 587  | KNDPLNDNI                  | ATLLHQSSDK  | FVSELWKL   | VDRIIGLDQVAG  | MSETALPGAF  | KTRKGMFRTV  | GQLYKEQLAK | LMATLRNTNP  | NVVRITIPNH  | EKKAGKLDPF                                       | 686  |
| Mg SmM  | 600  | KNDPLNDNV                  | TSLLNQSSDK  | FVADLWKL   | VDRIIGLDQMAK  | MTESSLSPSS  | KTKKGMFRTV  | GQLYKEQLTK | LMTTRNTNP   | NVVRITIPNH  | EKRAGKLDAP                                       | 699  |
| Hs SmM  | 594  | KNDPLNDNV                  | TSLLNQSSDK  | FVADLWKL   | VDRIIGLDQMAK  | MTESSLSPSS  | KTKKGMFRTV  | GQLYKEQLGK | LMTTRNTNP   | NVVRITIPNH  | EKRSGKLDAP                                       | 693  |
|         |      | Helix T                    | Helix U     | Helix V    | Loop 2        | Helix W     |             |            |             | β3          |                                                  |      |
| Hs NM2a | 687  | LVLDQLRNC                  | VLEGRICRQ   | GFPNRVVFQE | FRQRYEILTP    | NSIPKGFMDG  | KQACVLMKA   | LELDPNLYRI | GQSKVFFRAG  | VLAHLEED    | LKITDVIIGF                                       | 786  |
| Mg SmM  | 700  | LVLEQLRNC                  | VLEGRICRQ   | GFPNRVVFQE | FRQRYEILAA    | NAIPKGFMDG  | KQACILMKA   | LELDPNLYRI | GQSKIFFRAG  | VLAHLEED    | LKITDVIIGF                                       | 799  |
| Hs SmM  | 694  | LVLEQLRNC                  | VLEGRICRQ   | GFPNRVVFQE | FRQRYEILAA    | NAIPKGFMDG  | KQACILMKA   | LELDPNLYRI | GQSKIFFRAG  | VLAHLEED    | LKITDVIIGF                                       | 793  |
|         |      | Helix X                    | SH1 Helix   | Helix Z    | Helix A'      | Converter   | Helix B'    | Pliant     |             |             |                                                  |      |
| Hs NM2a | 787  | QACCRGYLAR                 | KAFARQOQL   | TAMKVIQRNC | AAYLKLRNWO    | WRRLFTRVRF  | LLQVSRQEE   | MMAEELVK   | VREKQLAAEN  | RLTEMETLOS  | QLMAEKLQQL                                       | 886  |
| Mg SmM  | 800  | QACCRGYLAR                 | KAFARQOQL   | TAMKVIQRNC | AAYLKLRNWO    | WRRLFTRVRF  | LLQVSRQEE   | MQAKDEELQR | TKERQQAEB   | ELKELEQKHT  | QLCEKNLLQ                                        | 899  |
| Hs SmM  | 794  | QACCRGYLAR                 | KAFARQOQL   | TAMKVIQRNC | AAYLKLRNWO    | WRRLFTRVRF  | LLQVSRQEE   | MQAKDEELQK | TKERQQAEN   | ELKELEQKHS  | QLTEKNLLQ                                        | 893  |
|         |      | Light chain binding region |             | Ring1      | Ring2         | Ring3       |             |            |             |             | Start of heptad repeats                          |      |
| Hs NM2a | 887  | EQLQAEETELC                | AEAEELRVR   | TAKQLEEEI  | CHDLARVEE     | EEEQQLQEA   | EKKMQQNIQ   | ELEEQLLEEE | SARQKLQLEK  | VTEAKLKL    | EEEQIILEDQ                                       | 986  |
| Mg SmM  | 900  | EKLQAEETELY                | AEAEEMRVR   | AAKQLEEEI  | LHEMEARIEE    | EEERSQQLQA  | EKKMQQMLQ   | DLEEQLLEEE | AARQKLQLEK  | VTADGKIKK   | EDDILIMEDQ                                       | 999  |
| Hs SmM  | 894  | EQLQAEETELY                | AEAEEMRVR   | AAKQLEEEI  | LHEMEARLEE    | EEEDRQQLQA  | ERKKMQQMLQ  | DLEEQLLEEE | AARQKLQLEK  | VTAAEAKIKL  | EDDILVMDQ                                        | 993  |
| Hs NM2a | 987  | NCKLAKKELK                 | LEDRIAEFTT  | NLTEEBEESK | SLAKLKNKHE    | AMITDLLEER  | RREKQRQEL   | EKTRRKLQEG | STDLSQIAE   | LAQAIAELM   | QLAKKEEELQ                                       | 1086 |
| Mg SmM  | 1000 | NNKLTKERKL                 | LEERVSDLT   | NLAEBEAK   | NLTKLKNKHE    | SMISELEVR   | KKEEKTROEL  | EKTRRKLQEG | SSDLHEQIAE  | LAQAIAELM   | QLAKKEEELQ                                       | 1099 |
| Hs SmM  | 994  | NNKLSKERKL                 | LEERISDLT   | NLAEBEAK   | NLTKLKNKHE    | SMISELEVR   | KKEEKSQEL   | EKTRRKLQEG | ASDFHQIAE   | LAQAIAELM   | QLAKKEEELQ                                       | 1093 |
| Hs NM2a | 1087 | AALARVEEFA                 | AQKNMALKKI  | RELESQISEL | QEDLESERAS    | RNKAQKQRD   | LGELEALKT   | ELEDLDSIA  | AQOELSKRE   | QEVNILKKT   | EBEAKTHEAQ                                       | 1186 |
| Mg SmM  | 1100 | AALARLEDET                 | SQKNMALKKI  | RELESHISDL | QEDLESERAA    | RNKAQKQRD   | LGELEALKT   | ELEDLDTTA  | TQOELRAKRE  | QEVTVLKRAL  | EBEATRTHEAQ                                      | 1199 |
| Hs SmM  | 1094 | AALARLDEET                 | AQKNMALKKI  | RELEGHISDL | QEDLDSERAA    | RNKAQKQRD   | LGELEALKT   | ELEDLDSIA  | TQOELRAKRE  | QEVTVLKRAL  | DEETRSHEAQ                                       | 1193 |
|         |      |                            |             |            |               |             |             | Bend 1     |             | Skip 1      |                                                  |      |
| Hs NM2a | 1187 | IQEMRQKHTQ                 | AVEELAEQLE  | QTKRVKANLE | KAKQTLENER    | GLLANEVKVL  | LQKGDSEHK   | RKKVAQLOL  | LQVFNQGER   | VRETELADKVT | KIQELDNT                                         | 1286 |
| Mg SmM  | 1200 | VQEMRQKHTQ                 | AVEELTEQLE  | QFKRAKANLD | KTKQTLKEDN    | ADLANEVRSL  | SOAKQDVEHK  | KKKLEVLQLD | LQSKYTDGER  | VRETELNEKVN | KLQIENVST                                        | 1299 |
| Hs SmM  | 1194 | VQEMRQKHTQ                 | AVEELTEQLE  | QFKRAKANLD | KNKQTLKEDN    | ADLAGELRVL  | GQAKQDVEHK  | KKKLEAVQVE | LQSKSDGER   | ARAEINDKVH  | KLQIENVST                                        | 1293 |
| Hs NM2a | 1287 | GLLSQSDSKS                 | SKLTKDVSAL  | ESQLQDTQEL | LQEBNRQKLS    | LSTKLQVED   | EKNSFREQLE  | EBEAKHNLE  | KQIATLHAQV  | ADMKKMDS    | VGCLETALEV                                       | 1386 |
| Mg SmM  | 1300 | SLLNEAESKN                 | IKLTKDVAFL  | GSQLDQTEL  | LQEBTRQKLN    | VTTKLRQVED  | DKNSLQQLD   | EEVEAKQNL  | RHISTLTQQL  | SDSKKQLQEF  | TATETMEEG                                        | 1399 |
| Hs SmM  | 1294 | GMLNEAEGKA                 | IKLAKDVASL  | SSQLQDTQEL | LQEBTRQKLN    | VSTKLRQVEE  | ERNSLQQLD   | EBEAKQNL   | RHISTLNIQL  | SDSKKQLQEF  | ASTVEALEEG                                       | 1393 |
|         |      |                            |             |            |               |             |             |            |             |             | Missing skip                                     |      |
| Hs NM2a | 1387 | KRKLQKDLQEG                | LSQRHEEKVA  | AYDKLEKTKT | RLQQLDLDL     | VLDLHORQSA  | CNLEKKQKPK  | DQLLEKTKT  | SAKYAEEDR   | AEAEAREKPT  | KALSARALE                                        | 1486 |
| Mg SmM  | 1400 | KKKQREIES                  | LTQQFEKAA   | SYDKLEKTKN | RLQQLDLDLV    | VLDLNRQQLV  | SNLEKKQKPK  | DQLLAEEKNI | SSKYADERDR  | AEAEAREKET  | KALSARALE                                        | 1499 |
| Hs SmM  | 1394 | KKRFRQEIEN                 | LTQQYEEKAA  | AYDKLEKTKN | RLQQLDLDLV    | VLDLNRQQLV  | SNLEKKQKPK  | DQLLAEEKNI | SSKYADERDR  | AEAEAREKET  | KALSARALE                                        | 1493 |
|         |      |                            |             |            |               |             |             |            |             |             | Interacts with SH3 and converter of blocked head |      |
| Hs NM2a | 1487 | EAMEQKAELE                 | RLNKQFRTEM  | EDLMSSKDDV | GKSVVELEKS    | KRALAQVEE   | MKTQLEELED  | ELQATEDAKL | KLEVNLAQMK  | AQFEDLQK    | DEQSEKQKQ                                        | 1586 |
| Mg SmM  | 1500 | EALAEKAELE                 | RTNKMKAEM   | EDLVSSKDDV | GKNVHELEKS    | KRTLEQVEE   | MKTQLEELED  | ELQAEADAKL | RLEVNMQAMK  | SQFERDLQAR  | DEQNEEKRRQ                                       | 1599 |
| Hs SmM  | 1494 | EALAEKAELE                 | RTNKMKAEM   | EDLVSSKDDV | GKNVHELEKS    | KRALAQVEE   | MKTQLEELED  | ELQATEDAKL | RLEVNMQAMK  | GQFERDLQAR  | DEQNEEKRRQ                                       | 1593 |
|         |      |                            |             |            |               |             |             | Bend 2     |             | Skip 2      |                                                  |      |
| Hs NM2a | 1587 | LVRQVREMEA                 | ELEDERKQRS  | MAVAARKKLE | MDLKDLEAH     | DSANKNRDEA  | IKQLRKLQAK  | MKQVRELDD  | TRASREEIFA  | QAKENEKKLK  | SPEAEMIQLQ                                       | 1686 |
| Mg SmM  | 1600 | LLKQLHEHET                 | ELEDERKQRA  | LAAAARKKLE | VVDKLESQV     | DSVNAKAREEA | IKQLRKLQAK  | MKDQRLDLD  | ARAAREEIFA  | TARENEKKA   | NLEAELIQLQ                                       | 1699 |
| Hs SmM  | 1594 | LQRQLHEHET                 | ELEDERKQRA  | LAAAARKKLE | GDLDLELQA     | DSALKGREEA  | IKQLRKLQAK  | MKDFQRELED | ARASDEEIFA  | TAKENEKKA   | SLEADLMQLQ                                       | 1693 |
| Hs NM2a | 1687 | EELAAERAK                  | RQAQQRDEL   | ADEIANSSGK | GALALEKRR     | LEAIAQLEE   | ELEEEQNGTE  | LINDRLKCAN | LQIDQINTDL  | NLERSHAQKN  | ENARQQLERQ                                       | 1786 |
| Mg SmM  | 1700 | EDLAAERAR                  | KQADLEKEEM  | AEELASATSG | RTSLQDDKRR    | LEARIAQLEE  | ELDEHSNIE   | AMSDRMKAV  | QQAELNNEL   | ATERATAQKN  | ENARQQLERQ                                       | 1799 |
| Hs SmM  | 1694 | EDLAAERAR                  | KQADLEKEEL  | AEELASSLSG | RNALQDEKRR    | LEARIAQLEE  | ELEEEQNGTE  | AMSDVRKAT  | QQAELSNEL   | ATERSTAQKN  | SARQQLERQ                                        | 1793 |
| Hs NM2a | 1787 | NKELVKVQLE                 | MEGTVKSKYK  | ASITALEAKI | AQLEEQLDNE    | TKERQAACKQ  | VRRTRKCLKD  | VLLQVDDERR | NAEQYKQAD   | KASTRLKQLK  | QLEEAEBEEA                                       | 1886 |
| Mg SmM  | 1800 | NKELRSKLQE                 | MEGAVKSKFK  | STIAALEAKI | ASLEEQLEQE    | AREKQAANKA  | LROKDKKLDK  | ALLQVEDEKK | QAEQYKQAE   | KGNLRLKQLK  | QLEEAEBEES                                       | 1899 |
| Hs SmM  | 1794 | NKELRSKLHE                 | MEGAVKSKFK  | STIAALEAKI | AQLEEQVQEQ    | AREKQAATKS  | LKQDKKLEK   | ILLQVEDERK | MAEQYKQAE   | KGNARVQQLK  | QLEEAEBEES                                       | 1893 |
|         |      |                            |             |            |               |             |             | Skip 3     |             |             |                                                  |      |
| Hs NM2a | 1887 | QRANASRRKL                 | QRELEDTET   | ADAMNREVSV | LKNKLRSD      | -LFPVVRKARK | ARK---GAG   | DGSDPEVQK  | ADGAEA-KPAE |             | 1960                                             |      |
| Mg SmM  | 1900 | QRINANRRKL                 | QRELEDTATES | NEAMGREVNA | LKSKLRRGNE    | -TSFVPSRRS  | GRRVVIENA-  | DGSEETDTR  | DADFNGTKASE |             | 1979                                             |      |
| Hs SmM  | 1894 | QRINANRRKL                 | QRELEDTATES | NDALGREVAA | LKSKLRRGNE    | PVSFAPRRS   | GRRVVIENAT  | DGGEQIDGR  | DGDLNG-KASE |             | 1972                                             |      |
|         |      |                            |             |            |               |             |             |            |             |             | Positions of Mutations                           |      |
|         |      |                            |             |            |               |             |             |            |             |             | ▼ Disease causing                                |      |
|         |      |                            |             |            |               |             |             |            |             |             | ▼ Disease causing?                               |      |
|         |      |                            |             |            |               |             |             |            |             |             | ▼ Variant of Unknown Significance                |      |
|         |      |                            |             |            |               |             |             |            |             |             | d position in heptad                             |      |
|         |      |                            |             |            |               |             |             |            |             |             | Non-helical tailpiece                            |      |
