# Supplementary material
Source: PubMed Central journal article supplement (PMC7611489)

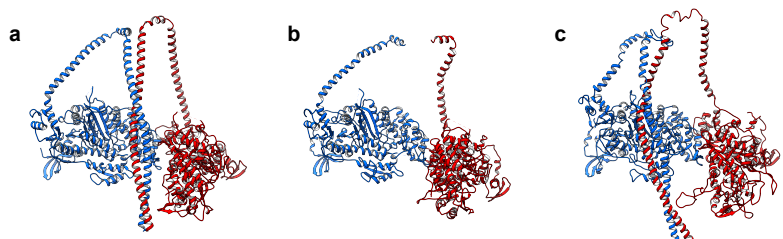

a Shutdown SmM (present study)      b SmM HMM - 1184      c Tarantula IHM - 3JBH

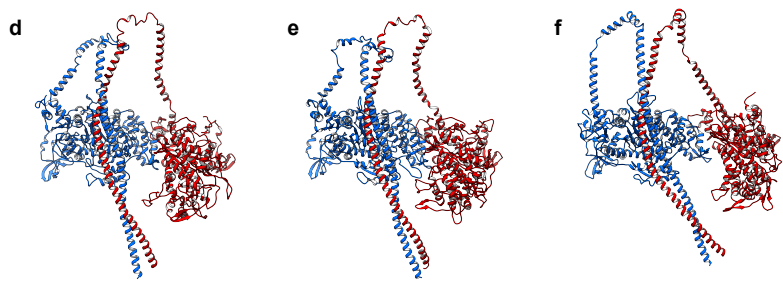

d Cardiac IHM model - 5TBY      e Cardiac IHM model - MS01      f Cardiac IHM model - Robert-Paganin et al., (2018) (SD2)

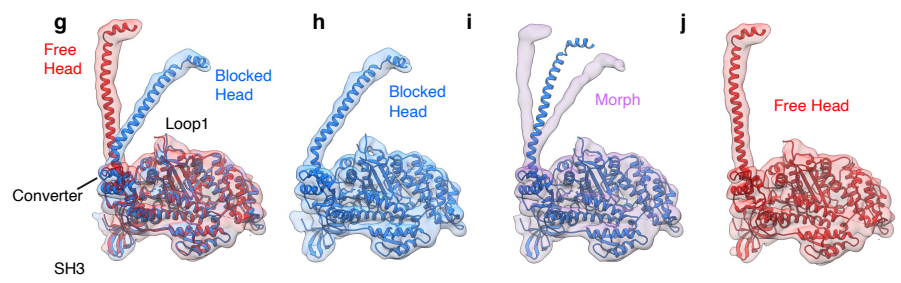

k

|     | <i>abcdefg</i> |
|-----|----------------|
| 849 | PLIQ           |
| 853 | VIRQEEE        |
| 860 | MQAKDEE        |
| 867 | LQRTKER        |
| 874 | QQKAEAE        |
| 881 | LKLEEQK        |
| 888 | HTQL           |

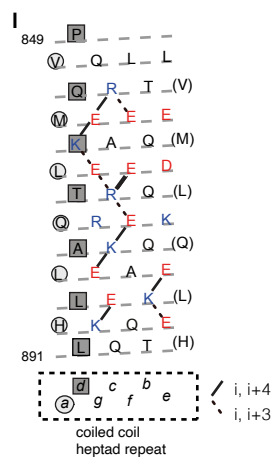

Supplement: EMS114600-supplement-ExtendedData_Fig4.pdf [file EMS114600-supplement-ExtendedData_Fig4.pdf]
