# Supplementary material
Source: PubMed Central journal article supplement (PMC7611489)
Supplement: EMS114600-supplement-ExtendedData_Table_1.pdf [file EMS114600-supplement-ExtendedData_Table_1.pdf]

| Location on myosin                                                                             | Residue                                                                   | Counterpart                                                        | Location on myosin                                                       |
|------------------------------------------------------------------------------------------------|---------------------------------------------------------------------------|--------------------------------------------------------------------|--------------------------------------------------------------------------|
| Blocked Head<br>SH3 domain<br>(residues 33-77)<br>and helix C<br>(residues 96-110),<br>chain A | Asp55<br>Lys77                                                            | Lys1423<br>Glu1434                                                 | Segment-2,<br>chain G                                                    |
| Blocked Head<br>SH1-helix (residues 710-719) and<br>Converter (residues 722-788),<br>chain A   | Arg718<br>Glu761<br>Glu761<br>Arg777                                      | Asp1437<br>Lys1454<br>Lys1457<br>Asp1443                           | Segment-2,<br>chain G                                                    |
| Blocked Head<br>ELC, chain C                                                                   | Glu47<br>Lys50<br>Lys50<br>Glu68                                          | Arg1485<br>Asp1478<br>Glu1481<br>Arg1496                           | Segment-2,<br>chain H                                                    |
| Segment-2, chain H<br>Close to bend 2                                                          | Glu1518<br>Glu1518<br>Asp1521<br>Asp1521                                  | Lys1538<br>Arg1541<br>Lys1540<br>Arg1541                           | Segment-3,<br>chain G<br>Close to bend 2                                 |
| Blocked Head<br>Loop O, chain A                                                                | Lys454<br>Arg455                                                          | Glu1595<br>Glu1610                                                 | Segment-3,<br>chain H                                                    |
| Free Head<br>Loop O, chain B                                                                   | Lys454                                                                    | Glu907                                                             | Segment-1,<br>chain A (Ring 1)                                           |
| Free Head<br>Loop 2,<br>chain H                                                                | Asp627<br>Asp629<br>Arg630                                                | Arg918<br>Lys922<br>Glu925                                         | Segment-1,<br>chain A                                                    |
| Free Head<br>HCM loop                                                                          | Arg411<br>Arg411                                                          | Glu938<br>Glu941                                                   | Segment-1,<br>chain B (Ring 2)                                           |
| Segment-3,<br>chain G                                                                          | Lys1626<br>Lys1633<br>Lys1633<br>Glu1636<br>Asp1640<br>Asp1640<br>Lys1644 | Glu907<br>Glu907<br>Glu914<br>Arg918<br>Arg918<br>Lys922<br>Glu925 | Segment-1,<br>chain B<br>R1:E905-R916<br>R2:E932-Q946<br>R3:A955-E969    |
| Segment-3,<br>chain G                                                                          | Lys1651<br>Lys1655                                                        | Glu934<br>Glu941                                                   | Segment-1,<br>chain A (Ring 2)                                           |
| Free Head<br>loop between helix E<br>and $\beta$ 4,                                            | Arg168<br>Glu169<br>Glu169                                                | Asp397<br>Arg400<br>Arg406                                         | Blocked Head<br>helix M, chain A<br>Blocked Head<br>Helix N,<br>HCM loop |
| Free Head<br>$\beta$ 4,<br>Blocked Head<br>RLC/LCD                                             | Asp170<br>Asp98<br>Arg827<br>Glu112                                       | Arg406<br>Arg1570<br>Asp1566<br>Arg1584                            | Blocked head<br>HCM loop,<br>Segment-3,<br>chain H                       |
