# Supplementary material
Source: PubMed Central journal article supplement (PMC7611489)
Supplement: EMS114600-supplement-ExtendedData_Table_2.pdf [file EMS114600-supplement-ExtendedData_Table_2.pdf]

|                                                  | SmM Shutdown Heads Region<br>(EMD-11069)<br>(PDB 6Z47) | SmM Shutdown Whole Molecule<br>(EMD-11070) |
|--------------------------------------------------|--------------------------------------------------------|--------------------------------------------|
| <b>Data collection and processing</b>            |                                                        |                                            |
| Microscope                                       | FEI Titan KRIOS                                        | FEI Titan KRIOS                            |
| Detector                                         | GATAN K2                                               | GATAN K2                                   |
| Voltage (keV)                                    | 300                                                    | 300                                        |
| Magnification                                    | x 130,000                                              | x 130,000                                  |
| Total electron exposure (e-/Å <sup>2</sup> )     | 60                                                     | 60                                         |
| Exposure time (s)                                | 8                                                      | 8                                          |
| Electron exposure per frame (e-/Å <sup>2</sup> ) | 1.5                                                    | 1.5                                        |
| Defocus range (µm)                               | -1.5 to -3.5                                           | -1.5 to -3.5                               |
| Pixel size (Å)                                   | 1.07                                                   | 1.07 (3.21 for processing)                 |
| Symmetry imposed                                 | C1                                                     | C1                                         |
| Initial particle images (no.)                    | 329,910                                                | 90,914                                     |
| Final particle images (no.)                      | 96,351                                                 | 52,713                                     |
| Map resolution (Å)                               | 6.3                                                    | 9.0                                        |
| FSC threshold                                    | 0.143                                                  | 0.143                                      |
| Map resolution range (Å)                         | 2.9-12                                                 |                                            |
| <b>Refinement</b>                                |                                                        |                                            |
| Initial model used (PDB code)                    | 1BR1, 2MYS, 1WDC, 3TS5 and beammotifCC                 |                                            |
| Map sharpening <i>B</i> factor (Å <sup>2</sup> ) | -362                                                   |                                            |
| Model composition                                |                                                        |                                            |
| Non-hydrogen atoms                               | 23399                                                  |                                            |
| Protein residues                                 | 2877                                                   |                                            |
| Ligands                                          | 8                                                      |                                            |
| R.M.S.D from ideal geometry                      |                                                        |                                            |
| Bond lengths (Å)                                 | 0.007                                                  |                                            |
| Bond angles (°)                                  | 1.062                                                  |                                            |
| Validation                                       |                                                        |                                            |
| MolProbity score                                 | 1.23                                                   |                                            |
| Clashscore                                       | 1.43                                                   |                                            |
| Poor rotamers (%)                                | 1.38                                                   |                                            |
| Ramachandran plot statistics                     |                                                        |                                            |
| Favored (%)                                      | 96.33                                                  |                                            |
| Allowed (%)                                      | 3.42                                                   |                                            |
| Disallowed (%)                                   | 0.24                                                   |                                            |
