# Supplementary material
Source: PubMed Central journal article supplement (PMC7611489)

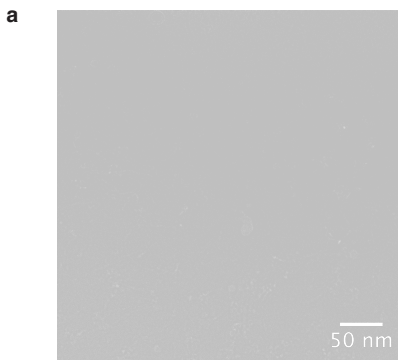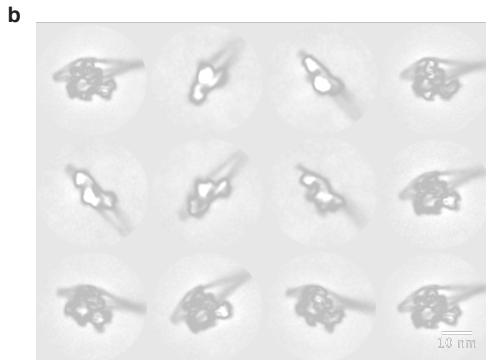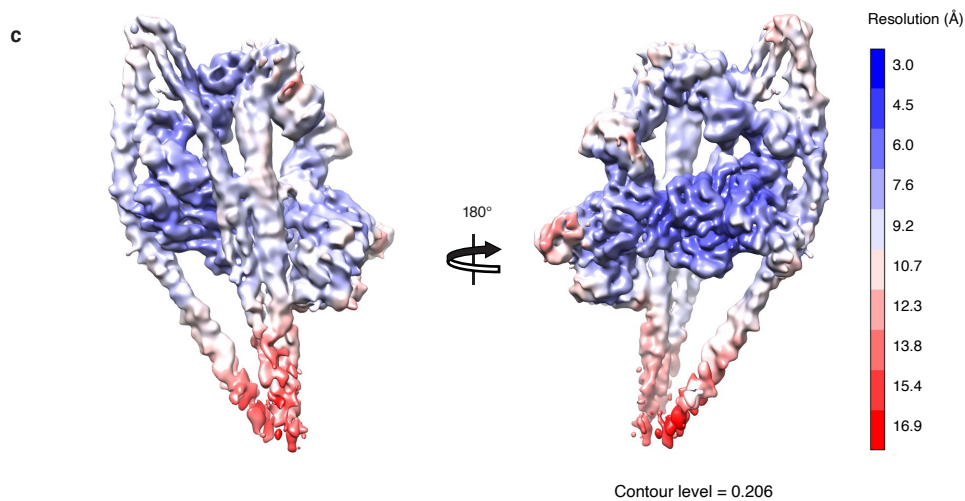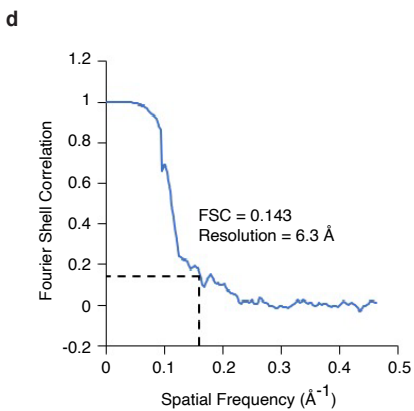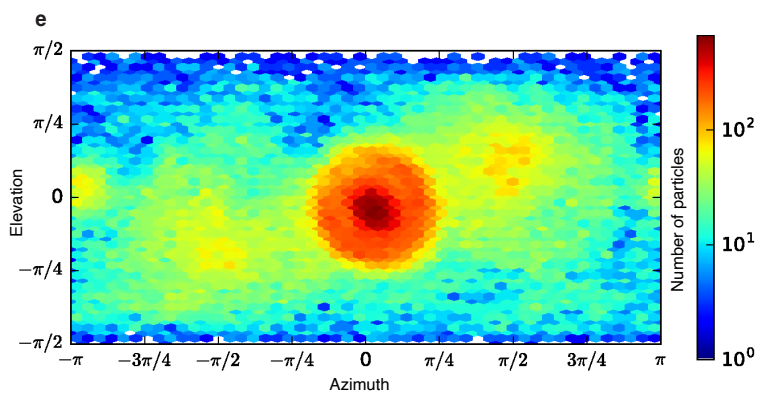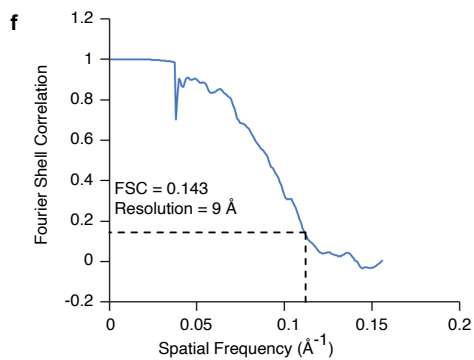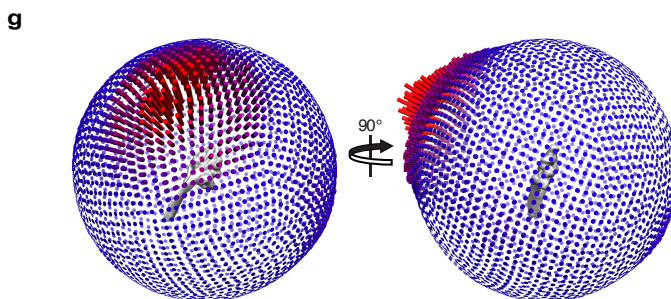

Supplement: EMS114600-supplement-ExtendedData_Fig1.pdf [file EMS114600-supplement-ExtendedData_Fig1.pdf]

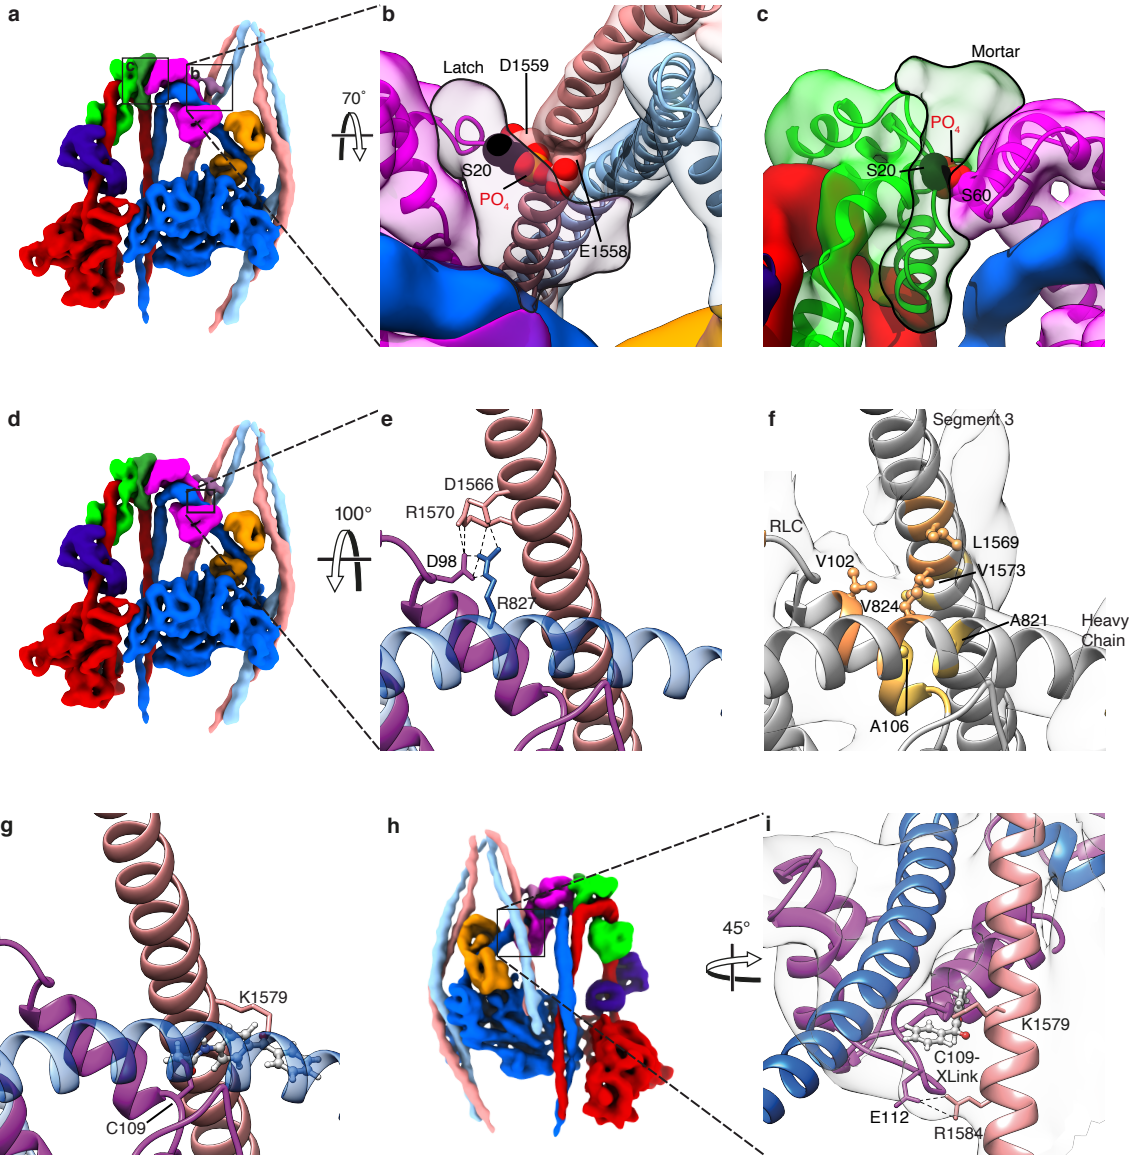

Supplement: EMS114600-supplement-ExtendedData_Fig2.pdf [file EMS114600-supplement-ExtendedData_Fig2.pdf]

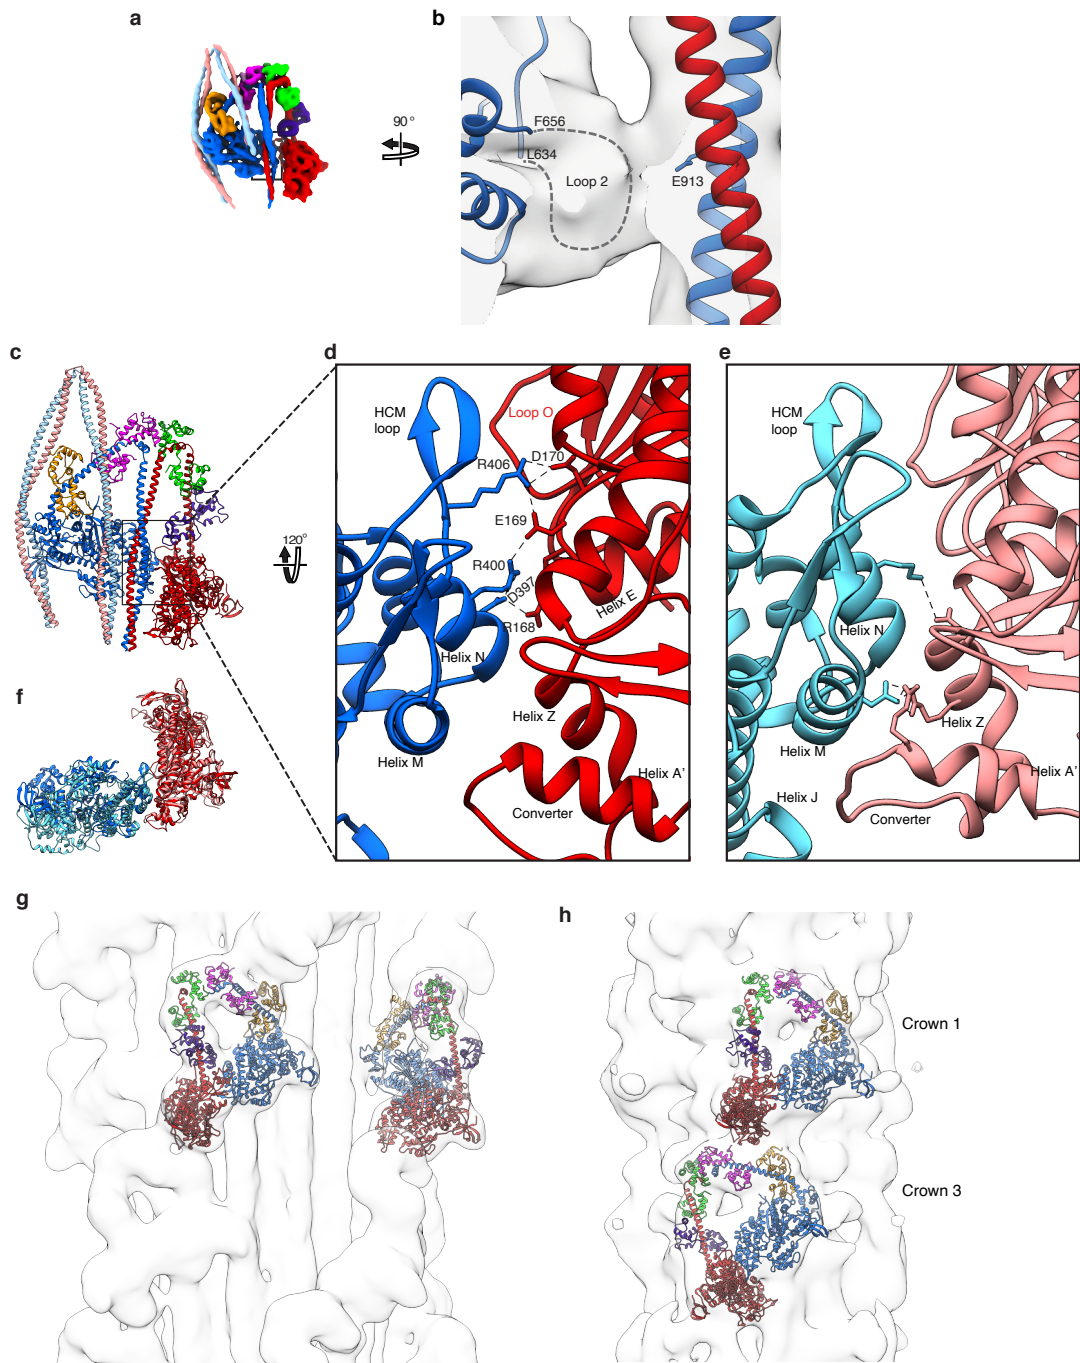

Supplement: EMS114600-supplement-ExtendedData_Fig5.pdf [file EMS114600-supplement-ExtendedData_Fig5.pdf]

**a**

7

11

15

22

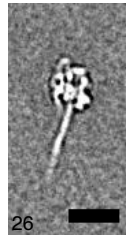

**b**

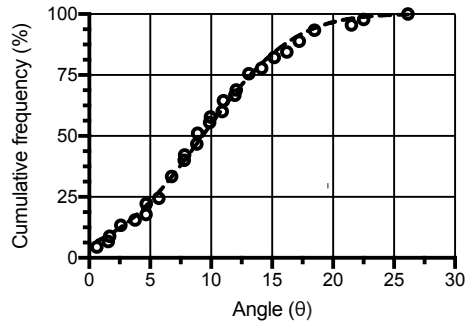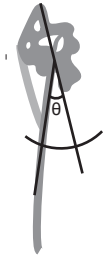

Supplement: EMS114600-supplement-ExtendedData_Fig6.pdf [file EMS114600-supplement-ExtendedData_Fig6.pdf]

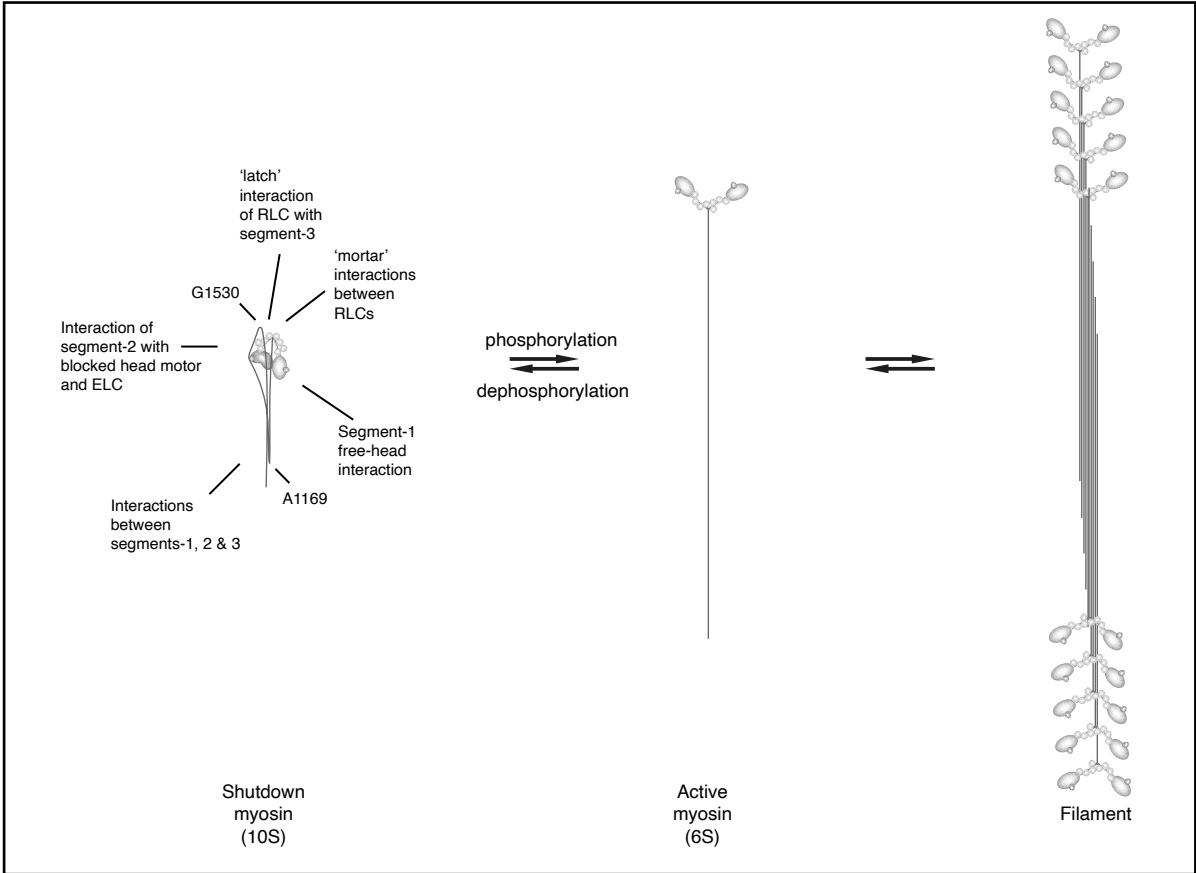

Supplement: EMS114600-supplement-ExtendedData_Fig7.pdf [file EMS114600-supplement-ExtendedData_Fig7.pdf]
